# Supplementary material for: Synthesis and properties of highly sulfonated proton conducting polyimides from bis(3-sulfopropoxy)benzidine diaminesElectronic supplementary information (ESI) available: 1H NMR spectra of BSPB diamines and IR spectra of resulting polyimide membranes. See http://www.rsc.org/suppdata/jm/b3/b313276e/
Source: Royal Society of Chemistry journal article supplement (doi:10.1039/b313276e), 2004-01-01
Supplement: b313276e.pdf [file b313276e.pdf]

<sup>1</sup>HNMR spectra of BSPB diamines and IR spectra of resulting polyimide membranes

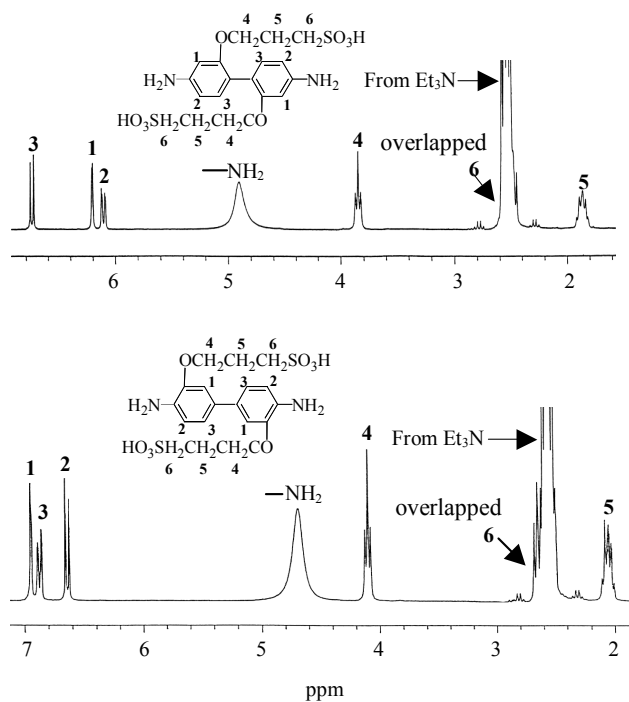

Fig. S1 <sup>1</sup>HNMR spectra of BSPB diamine monomers.

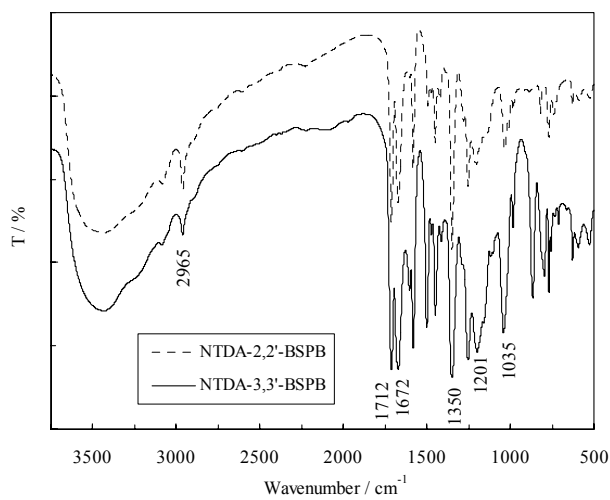

Fig. S2 IR spectra of NTDA-BSPB membranes.
